# Supplementary material
Source: publisher figshare collection journal article supplement (https://frontiersin.figshare.com/ndownloader/files/22205622)
Supplement: Supplementary file [file 22205622]

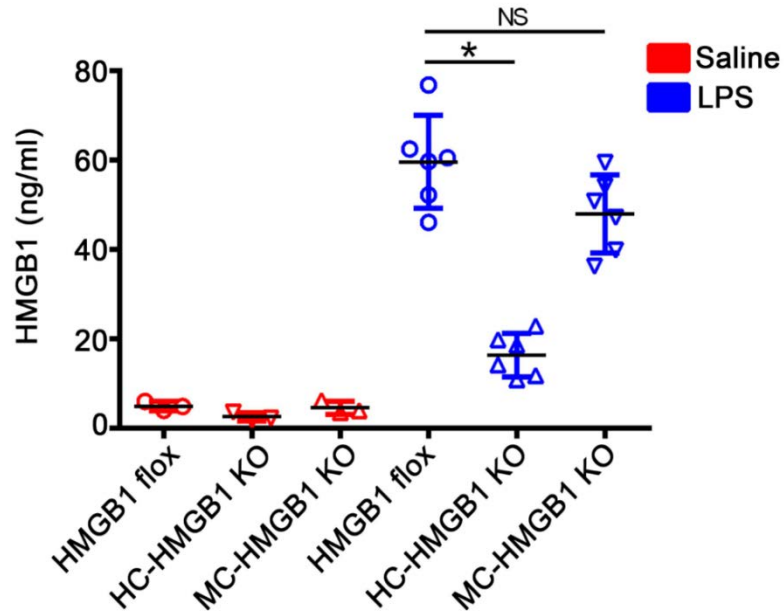

**Supplemental Fig 1. Hepatocytes are the dominant source of the increases in circulating HMGB1 during endotoxemia.**

HMGB1 flox, hepatocytes specific HMGB1 knockout mice (HC-HMGB1 KO) and myeloid cells specific HMGB1 knockout mice (MC-HMGB1 KO) were intraperitoneally injected with LPS(5mg/kg) for 4h. Plasma HMGB1 levels were tested by Elisa. Each symbol represents one mouse. \*  $P < 0.05$ . NS: no significant difference.

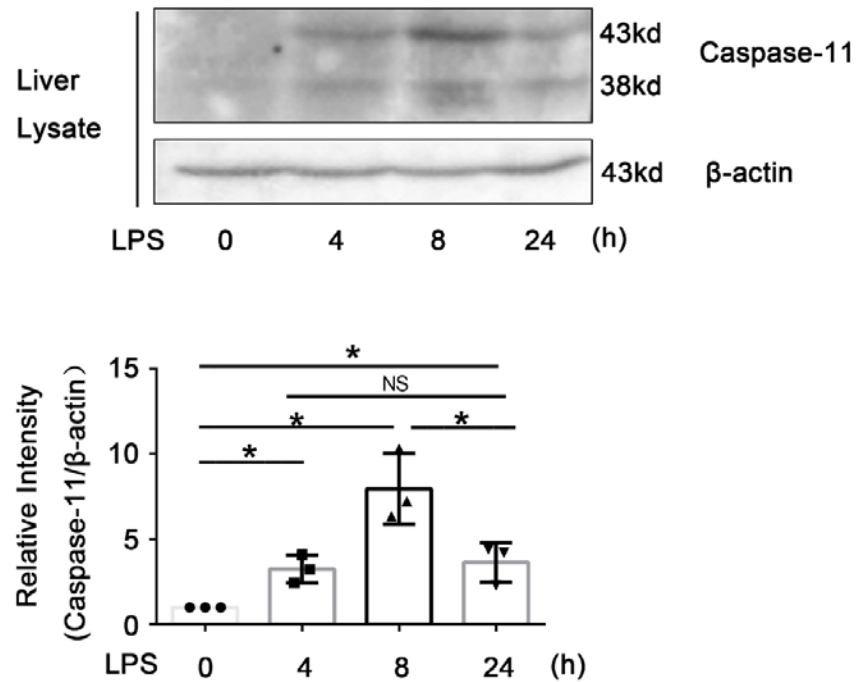

**Supplemental Fig 2. LPS treatment in vivo led to an increase in liver levels of caspase-11**

WT mice were treated with LPS(5mg/kg) as indicated time point. The Immuno-blot image shows one representative image for caspase-11 and β-actin in the liver tissue lysate. Quantification charts show mean  $\pm$  SEM of Caspase-11 to β-actin of three individual experiment. \*P<0.05. NS: no significant difference.

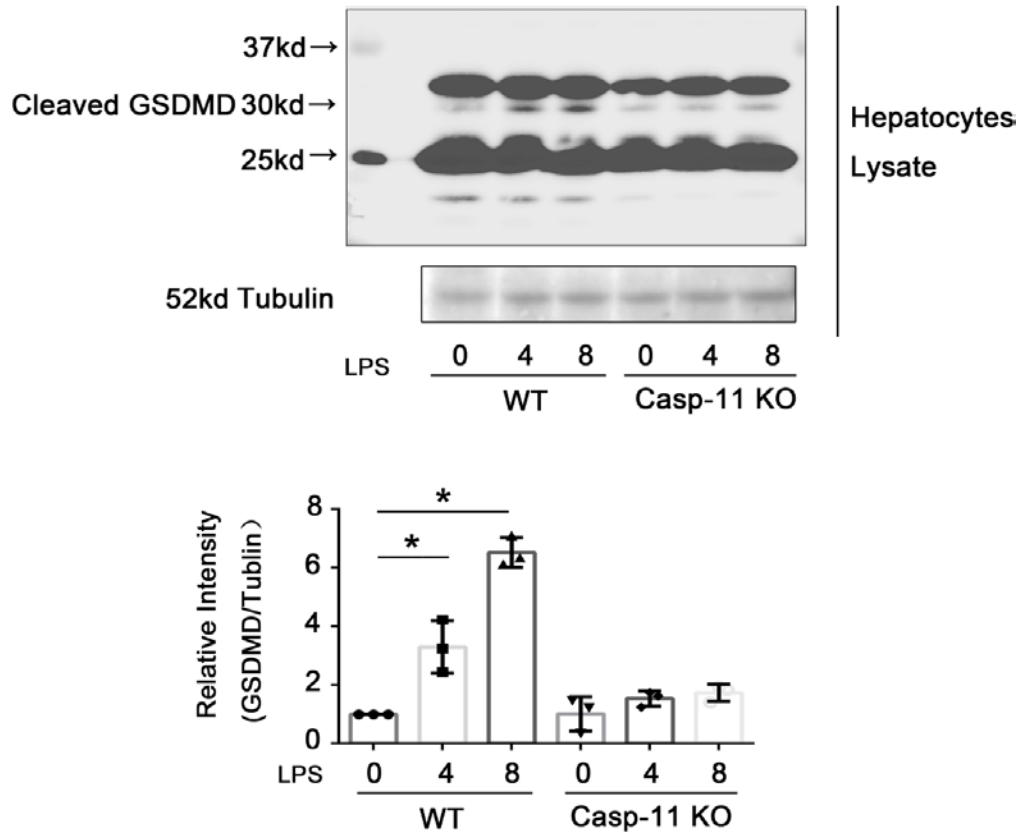

**Supplemental Fig 3. LPS treatment of cultured hepatocytes led to a caspase-11 dependent cleavage of GSDMD**

WT or caspase-11<sup>-/-</sup> hepatocytes were treated with LPS(1ug/ml) as indicated time point. The Immuno-blots image shows one representative image for GSDMD and Tublin in hepatocytes lysate. Quantification charts show mean  $\pm$  SEM of GSDMD to Tublin of three individual experiments. \*P<0.05.

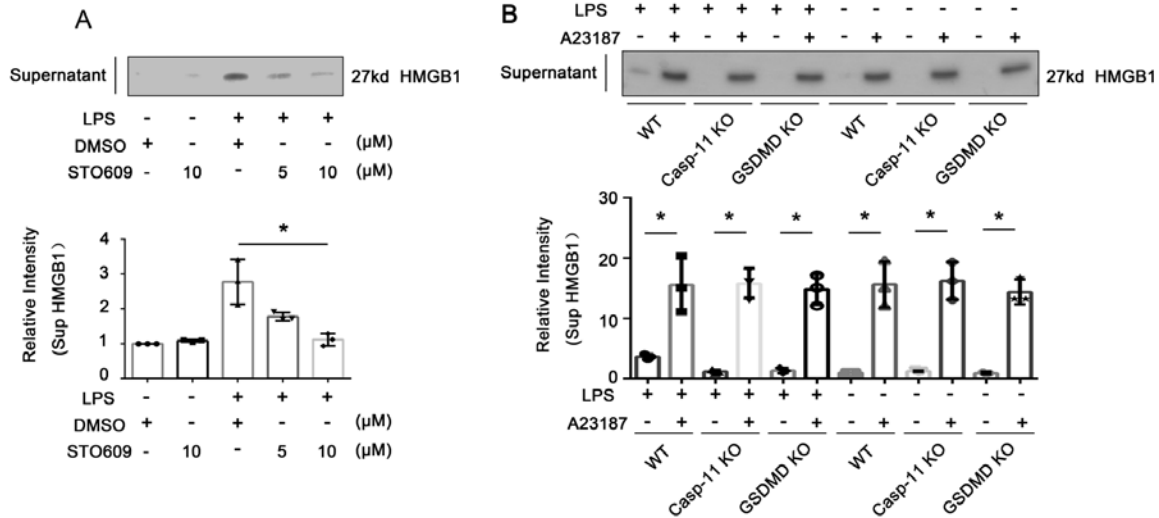

**Supplemental Fig 4. STO-609 and A23187 effect on HMGB1 release from hepatocytes**

**A:** WT hepatocytes were treated with STO-609 as the indicated concentration for 1h and then challenged with LPS (1 $\mu$ g/ml) for 24h. The Immuno-blots image shows one representative image for HMGB1 in the supernatant. Quantification charts show mean  $\pm$  SEM of HMGB1 in the supernatant of three individual experiments. \*P<0.05.

**B:** WT hepatocytes were treated with or without A23187 (5 $\mu$ M) for 1h and then challenged with or without LPS (1 $\mu$ g/ml) for 24h. The Immuno-blots image shows one representative image for HMGB1 in the supernatant. Quantification charts show mean  $\pm$  SEM of HMGB1 in the supernatant of three individual experiments. \*P<0.05.

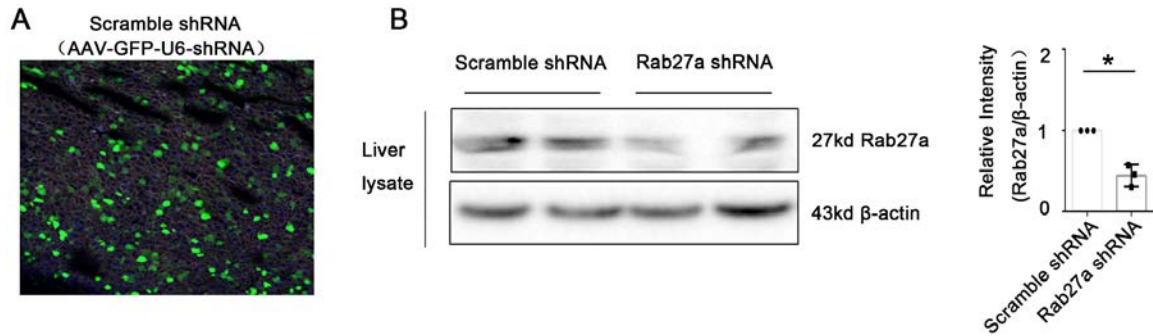

**Supplemental Fig 5: Rab27a is successfully knockdown.**

**A:** WT mice were injected into the penile vein with scramble shRNA for 48h. Liver section was observed by the confocal microscope.

**B:** WT mice were injected into the penile vein with scramble shRNA or Rab27a shRNA for 48h. Immuno-blots for Rab27a and β-actin in the liver tissue lysate.

The Immuno-blots image shows one representative image for Rab27a and β-actin in the liver lysate. Quantification charts show mean ± SEM of relative Rab27a intensity of three individual experiments. \*P<0.05.

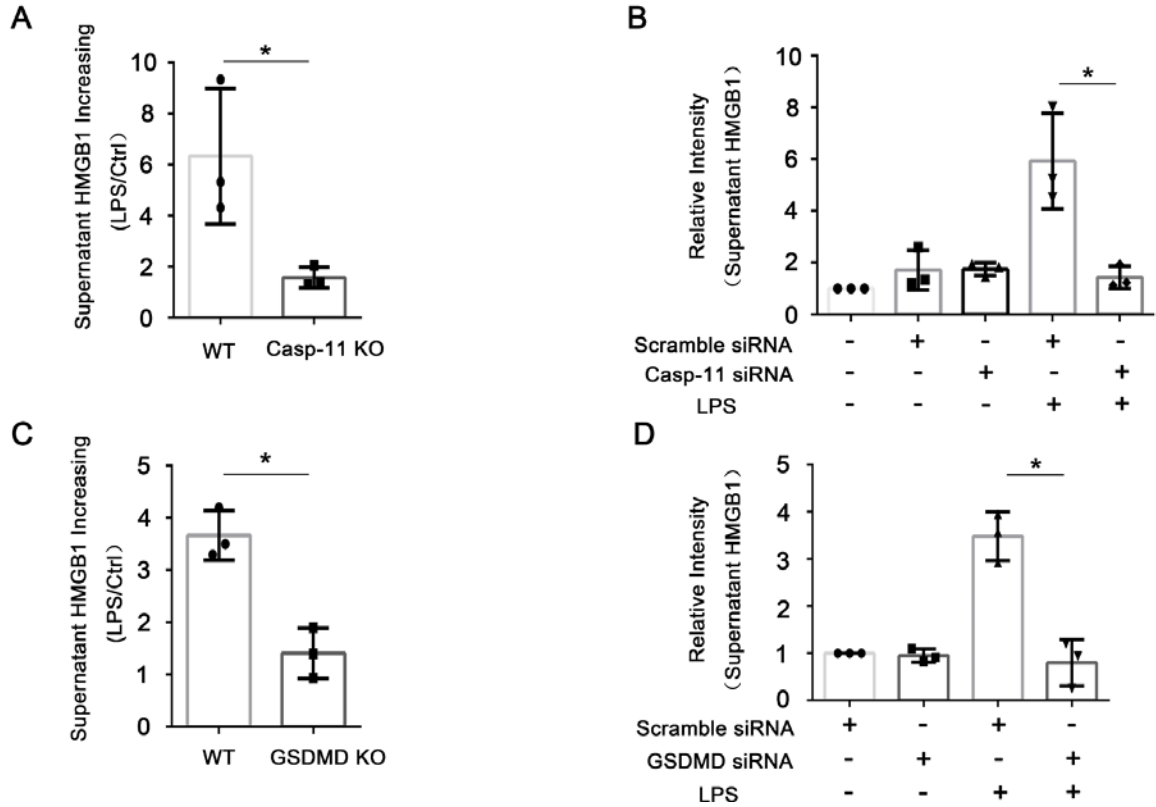

**Supplemental Fig 6: Quantification of Immunoblots in Fig1**

**A, C:** Immuno-blots image quantification charts show mean  $\pm$  SEM of supernatant HMGB1 increasing of WT, caspase-11<sup>-/-</sup> (Caspase-11 KO) and GsdmD<sup>-/-</sup> (GsdmD KO) hepatocytes at 24h after LPS (1ug/ml) of three individual experiments. \*P<0.05.

**B, D:** Hepatocytes pretreated with siRNA to knock down caspase-11 or GSDMD prior to LPS treatment for 24h. Immuno-blots image quantification charts show mean  $\pm$  SEM of relative HMGB1 intensity in the supernatant of three individual experiments. \*P<0.05.

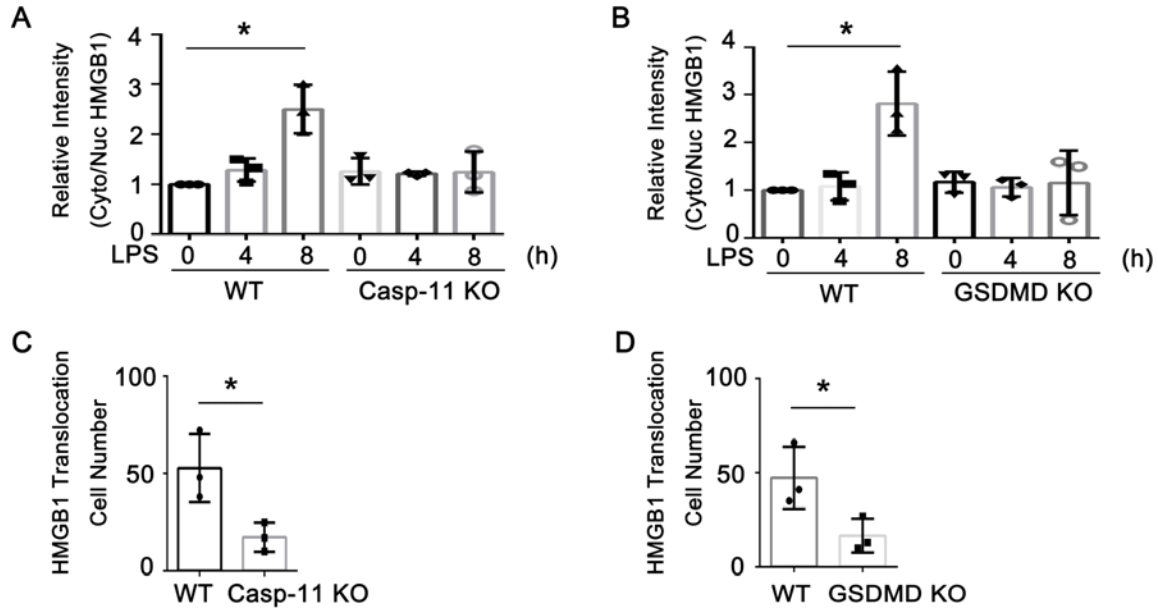

**Supplemental Fig 7: Quantification of Western blot in Fig3**

**A, B:** Immuno-blots image quantification charts show mean  $\pm$  SEM of cytoplasmic (Cyto) HMGB1/ nucleus (Nuc) HMGB1 of WT, caspase-11<sup>-/-</sup> (Casp-11 KO) or GsdmD<sup>-/-</sup> (GSDMD KO) hepatocytes of three individual experiments. Cells were treated with LPS (1ug/ml) for time as indicated. \*P<0.05.

**C, D:** Immunofluorescence quantification charts show mean  $\pm$  SEM of HMGB1 translocation positive cells of WT, caspase-11<sup>-/-</sup> or GsdmD<sup>-/-</sup> hepatocytes treated with LPS (1ug/ml) for 8 hours of three individual experiments. HMGB1 translocation positive cells were evaluated and counted by two experienced individuals. \*P<0.05.

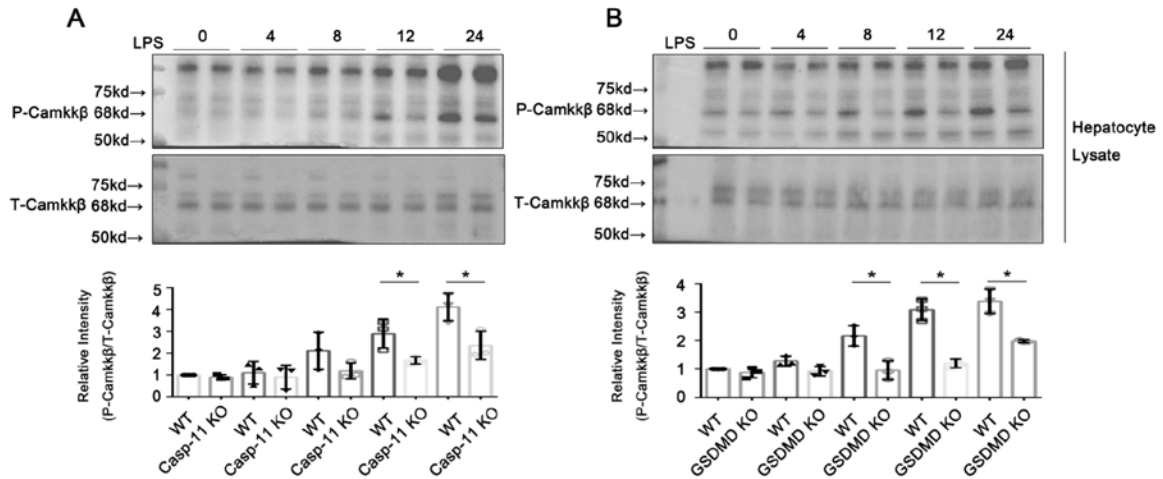

**Supplemental Fig 8: Quantification of Western blot in Fig4**

**A, B:** Immuno-blots image quantification charts show mean  $\pm$  SEM of phospho-camkk $\beta$  (P-camkk $\beta$ ) / total-camkk $\beta$ (T-camkk $\beta$ ) in whole cell lysates of WT, caspase-11 $^{-/-}$  (Casp-11 KO) or GsdmD $^{-/-}$  (GSDMD KO) hepatocytes of three individual experiments. Cells were treated with LPS (1ug/ml) for indicated times. \*P<0.05.



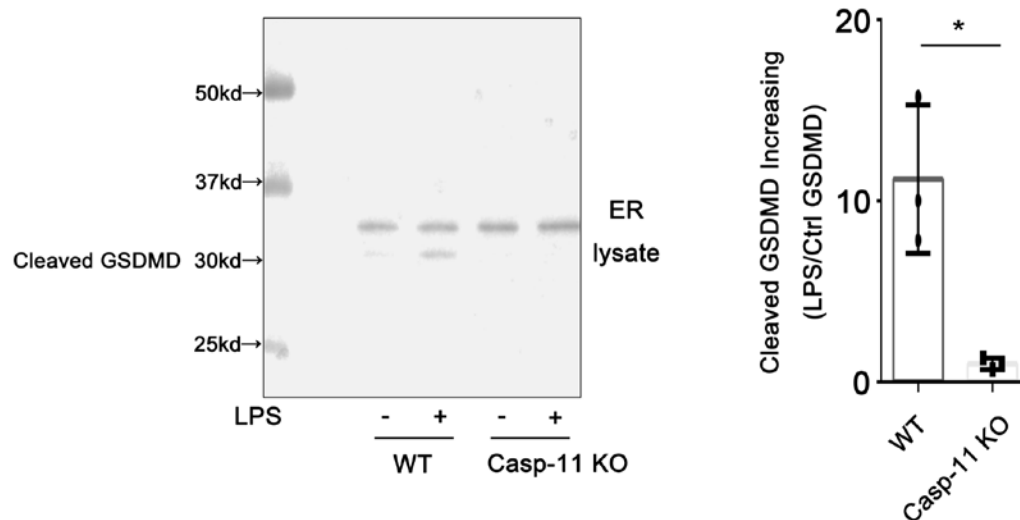

### Supplemental Fig 9: Quantification of Western blot in Fig5

The Immuno-blots image shows one representative image for cleaved GSDMD in the endoplasmic reticulum (ER) lysate. Immuno-blots image quantification charts show mean  $\pm$  SEM of cleaved GSDMD increasing in ER lysate of WT and caspase-11<sup>-/-</sup> (Casp-11 KO) hepatocytes of three individual experiments. Cells were treated with LPS (1ug/ml) for 8 hours. \*P<0.05.

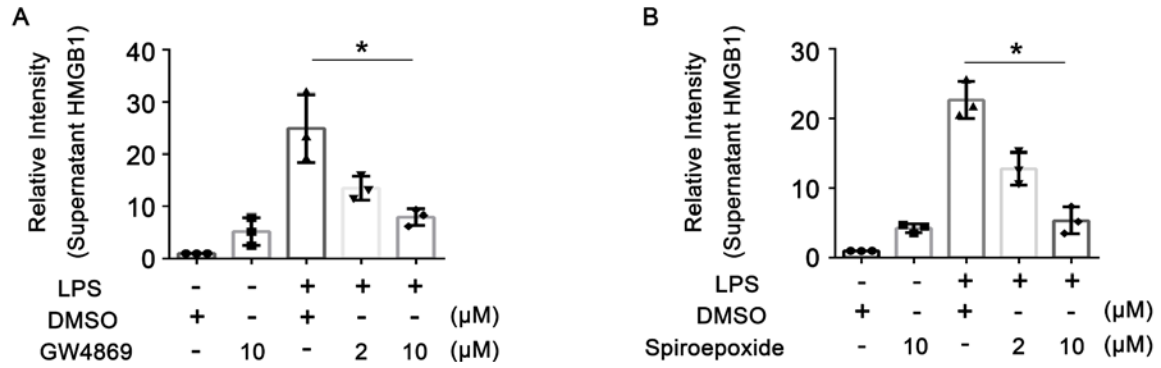

**Supplemental Fig 10: Quantification of Western blot in Fig6**

**A, B:** Immuno-blots image quantification charts show mean  $\pm$  SEM of HMGB1 in the supernatant of WT hepatocytes of three individual experiments. Cells were treated with GW4869 or spiroepoxide for 2h, then challenged with LPS (1ug/ml) for 24h. \*P<0.05.

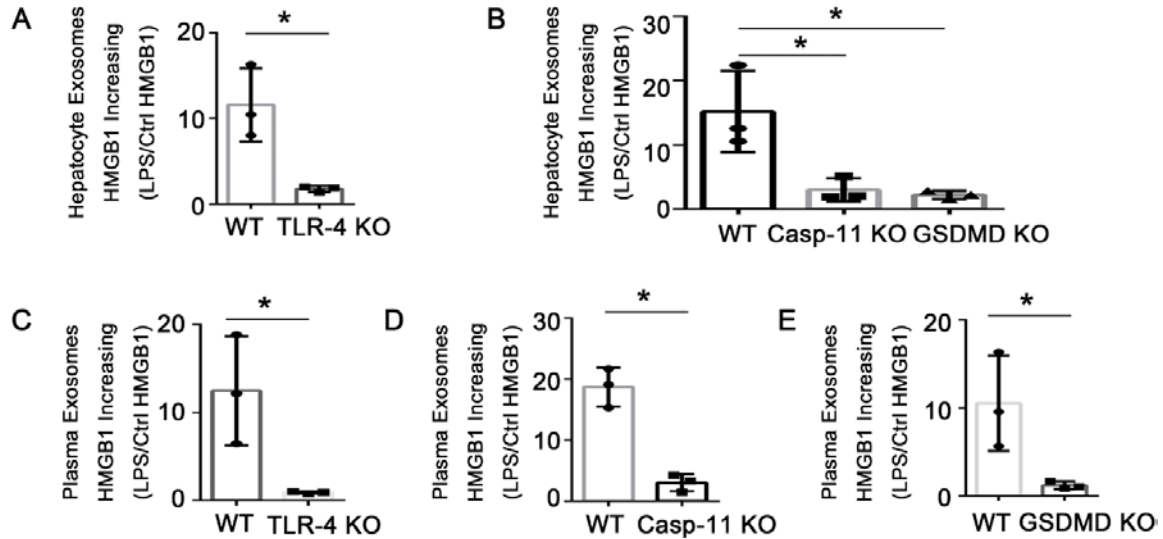

**Supplemental Fig 11: Quantification of Western blot in Fig7**

**A, B:** Immuno-blots image quantification charts show mean  $\pm$  SEM of HMGB1 increasing in exosomes of WT, TLR4<sup>-/-</sup> (TLR4 KO), caspase-11<sup>-/-</sup> (Casp-11 KO) or GsdmD<sup>-/-</sup> (GSDMD KO) hepatocytes of three individual experiments. Cells were treated with LPS (1ug/ml) for 24h. \*P<0.05.

**C, D, E:** Immuno-blots image quantification charts show mean  $\pm$  SEM of HMGB1 increasing in plasma exosomes of WT, TLR4<sup>-/-</sup> (TLR4 KO), caspase-11<sup>-/-</sup> (Casp-11 KO) or GsdmD<sup>-/-</sup> (GSDMD KO) mice of three individual experiments. Mice were treated with LPS (1ug/ml) for 4h. \*P<0.05.

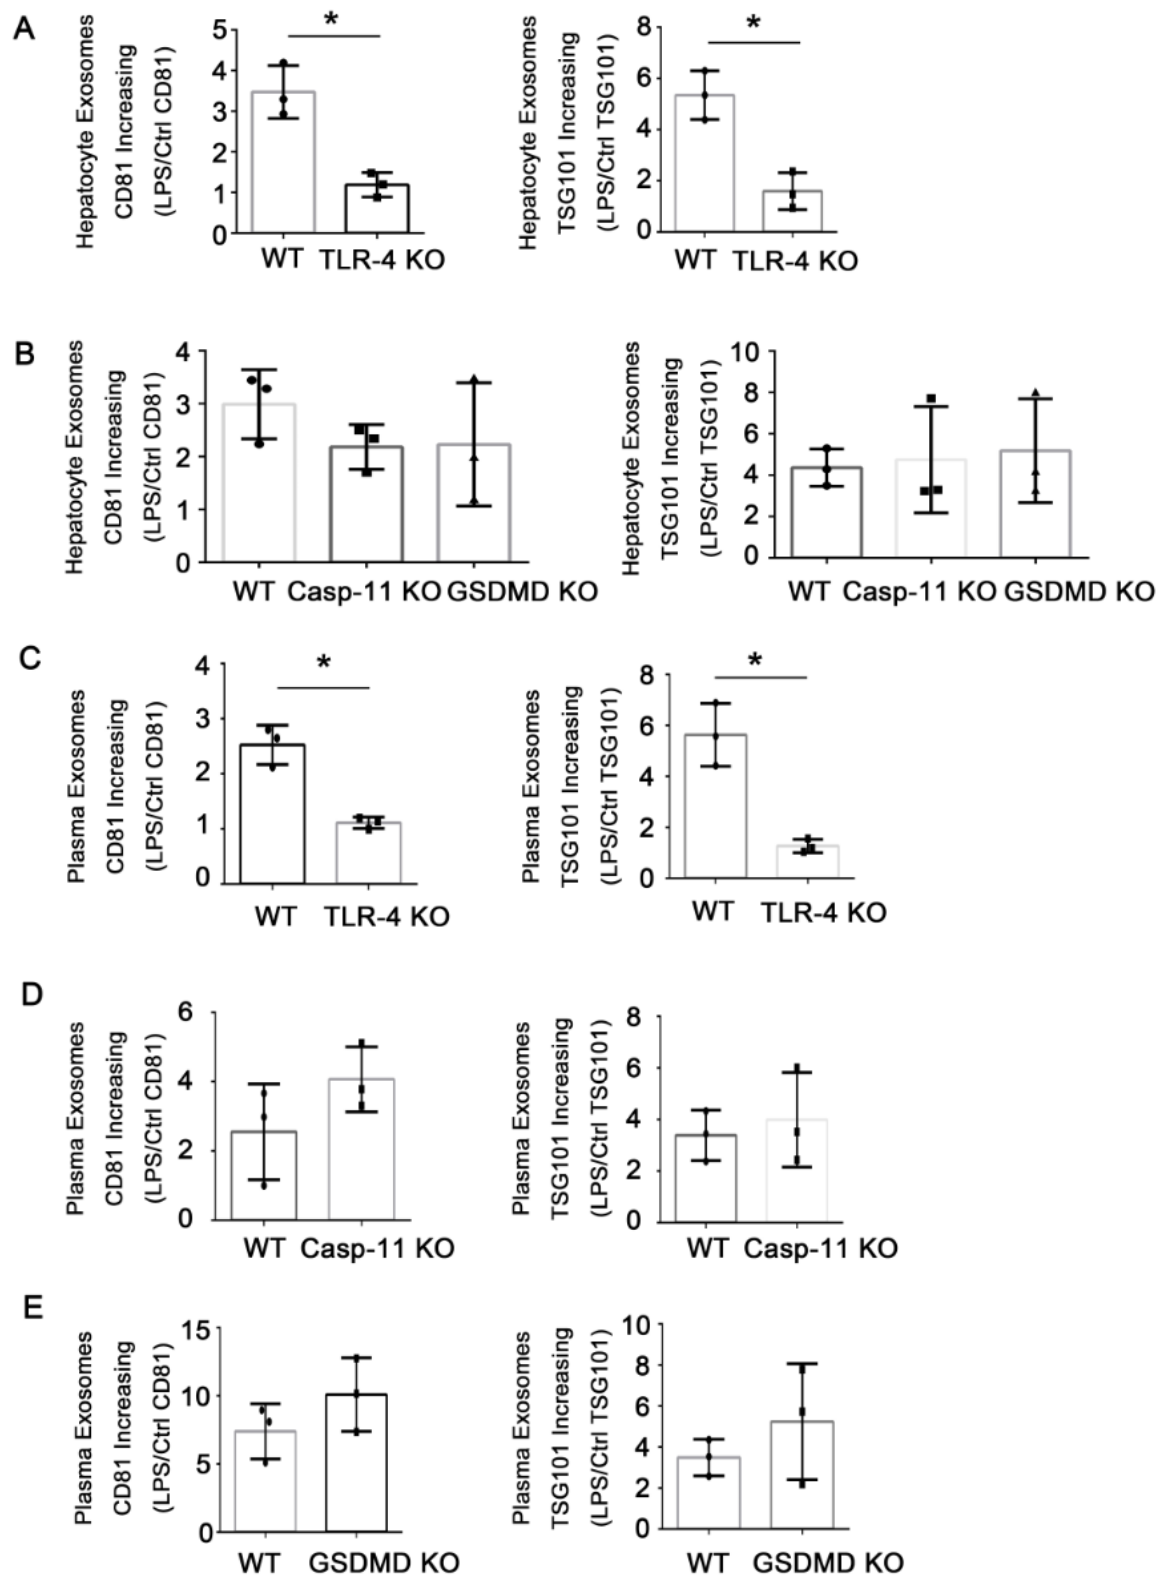

Supplemental Fig 12: Quantification of Western blot in Fig8

**A, B:** Immuno-blots image quantification charts show mean  $\pm$  SEM of CD81 and TSG101 increasing in exosomes of WT, TLR4<sup>-/-</sup> (TLR4 KO), caspase-11<sup>-/-</sup> (Casp-11 KO) or GsdmD<sup>-/-</sup> (GSDMD KO) hepatocytes of three individual experiments. Cells were treated with LPS (1ug/ml) for 24h. \*P<0.05.

**C, D, E:** Immuno-blots image quantification charts show mean  $\pm$  SEM of CD81 and TSG101 increasing in plasma exosomes of WT, TLR4<sup>-/-</sup> (TLR4 KO), caspase-11<sup>-/-</sup> (Casp-11 KO) or GsdmD<sup>-/-</sup> (GSDMD KO) mice of three individual experiments. Mice were treated with LPS (1ug/ml) for 4h. \*P<0.05.
